# Supplementary material
Source: PubMed Central journal article supplement (PMC6624169)
Supplement: supplement_material_djy167.pdf [file supplement_material_djy167.pdf]

## **Supplementary Materials**

### **Supplementary Methods**

#### *Description of Data Sources Used to Identify Systemic Therapy*

The initiation of systemic treatment was determined using evidence from one or more of four data sources: 1) Ontario Health Insurance Plan (OHIP) physician billing codes for systemic therapy administration; 2) procedure codes for systemic therapy administration within the National Ambulatory Care Reporting System (NACRS), which collects data from hospital- and community-based outpatient procedures; 3) receipt of systemic therapy within the Cancer Care Ontario Activity Level Reporting dataset, which captures all systemic therapy administered in regional cancer centers; and 4) records within the New Drug Funding Plan, which covers the cost of newer systemic therapies. The latter two datasets provided information on the specific drugs or therapy regimens administered. OHIP and NACRS billing codes are shown in Supplementary Table 4. Common systemic therapies observed in the Cancer Care Ontario and New Drug Funding Plan datasets are shown in Supplementary Tables 5 and 6.

#### *Time-Varying Covariate Analysis for the Effect of Recent Systemic Therapy*

After initiation of systemic therapy, many patients received additional courses of systemic therapy during follow-up. We examined the effect of recent receipt of systemic therapy on AKI risk using a separate Cox proportional hazards model. The 90-day period after chemotherapy exposure has been suggested as a period of increased risk for AKI [1]. We therefore defined recent exposure to systemic therapy as the 90-day

period following each treatment during follow-up. Exposures to therapy during follow-up were ascertained using the same data sources used to determine the initiation of systemic therapy. We compared these periods of 'active treatment' during follow-up to periods in which patients had not recently been exposed to any systemic therapy (for at least the preceding 90 days). If patients received multiple systemic therapies within 90 days, the exposure period was extended to include the 90-day period following the most recent treatment. After the 90-day period following treatment had elapsed the time-varying covariate would revert to being 'unexposed'. In this way, patients contributed person-time to 'exposed' and 'unexposed' periods during the course of their follow-up. The hazard ratio from this analysis therefore compares the hazard of AKI during exposed person-time relative to unexposed person-time. The other covariates used in this model were the same (time-fixed) variables used in the primary model. We accounted for the competing risk of death using cause-specific hazard ratios in this model. Supplementary Figure 1 provides an illustrative example of patient exposure status in this time-varying covariate analysis.

#### *Effect of Co-Prescriptions Subcohort Analysis*

We evaluated the effect of commonly co-prescribed medications on AKI risk, including angiotensin-converting enzyme inhibitors (ACEi) or angiotensin-receptor blockers (ARB), beta-blockers, calcium channel blockers, diuretics, and statins in the subcohort of patients 66 years of age and older who receive outpatient drug benefits. We used the Ontario Drug Benefits database to ascertain prescription drug exposure in the 120-days preceding systemic therapy initiation. This database records prescription

drug dispensing and has an error rate of <1% [2]. We fitted a multivariable Fine and Gray model in this subcohort and reported subdistribution HRs for the risk of AKI associated with each drug class.

### *Temporal Trends in Annual AKI Incidence Rates*

We reported annual AKI and AKI-D incidence rates from 2007 to 2014 in terms of event rate per 1,000 patient-years. AKI/AKI-D events were attributed to the year in which patients initiated systemic therapy (i.e. the year of cohort entry), rather than the year in which AKI occurred. In this way, we avoided over-attribution of AKI events to the later years of the study period due to disease progression over time or episodes associated with end-of-life care. The Cochran-Armitage test was used to assess two-sided p-value for trends.

### *AKI Risk Associated with Therapies in High-risk Cancers (Post hoc analysis)*

We assessed the association between specific cancer therapies and AKI risk in separate models for three cancers with frequent incidence of AKI: bladder cancer, multiple myeloma and leukemia. We reviewed and manually categorized the initial treatments recorded in the Cancer Care Ontario Activity Level Reporting dataset for patients with each of these cancers.

In bladder cancer, we categorized the initial treatments as regimens including cisplatin, carboplatin, or other (i.e., non-platinum-based therapies). In multiple myeloma, therapies were primarily recorded as receipt of individual drugs, and as such, we

analyzed AKI risk associated with each agent (e.g., bortezomib, cyclophosphamide, immunomodulatory drugs, etc.). For leukemia, we compared treatments for acute versus chronic leukemia. These three models were also adjusted for all other (time-fixed) covariates used in the primary model.

In multiple myeloma and leukemia, we also analyzed AKI risk associated with receipt of HSCT as a time-varying exposure and assessed the hazard of AKI in the 30-day, 31-90-day, and 91-day to 1-year periods after HSCT (versus not having undergone HSCT, or having undergone HSCT more than 1-year prior).

### *Missing Data*

Demographic data (e.g., age and sex) were required for cohort entry and were therefore complete in our data. Missing rural or long-term facility residence indicators were interpreted to reflect non-rural and non-long-term care facility residence, respectively (<0.5% of the cohort). Other comorbidity covariates have been well-validated in Institute for Clinical Evaluative Sciences administrative data and absent diagnostic indicators were interpreted as non-presence of the comorbid conditions [3].

Cancer staging data was missing in 28.6% of patients. Given this proportion, use of single or multiple imputation-based methods, missing value indicators, or complete case analysis may all lead to biased effect estimates [4, 5]. The latter would also be associated with loss of statistical power. Notwithstanding the limitations of this approach, we opted to model this covariate with inclusion of a 'missing' stage category and therefore reported associated adjusted hazard ratios for patients without available data on cancer stage at diagnosis.

## Supplementary Tables

**Supplementary Table 1. REporting of studies Conducted using Observational Routinely-collected health Data (RECORD) Statement\***

| Section               | Item No. | STROBE items                                                                                                                                                                                                        | RECORD items                                                                                                                                                                                                                                                                                                                                                                                                                                                                                                        | Reported                                        |
|-----------------------|----------|---------------------------------------------------------------------------------------------------------------------------------------------------------------------------------------------------------------------|---------------------------------------------------------------------------------------------------------------------------------------------------------------------------------------------------------------------------------------------------------------------------------------------------------------------------------------------------------------------------------------------------------------------------------------------------------------------------------------------------------------------|-------------------------------------------------|
| Title and abstract    | 1        | (a) Indicate the study's design with a commonly used term in the title or the abstract.<br>(b) Provide in the abstract an informative and balanced summary of what was done and what was found.                     | (1.1) The type of data used should be specified in the title or abstract. When possible, the name of the databases used should be included.<br>(1.2) If applicable, the geographic region and time frame within which the study took place should be reported in the title or abstract.<br>(1.3) If linkage between databases was conducted for the study, this should be clearly stated in the title or abstract.                                                                                                  | Title Page/Abstract                             |
| <b>Introduction</b>   |          |                                                                                                                                                                                                                     |                                                                                                                                                                                                                                                                                                                                                                                                                                                                                                                     |                                                 |
| Background/ rationale | 2        | Explain the scientific background and rationale for the investigation being reported.                                                                                                                               | --                                                                                                                                                                                                                                                                                                                                                                                                                                                                                                                  | Abstract                                        |
| Objectives            | 3        | State specific objectives, including any prespecified hypotheses.                                                                                                                                                   | --                                                                                                                                                                                                                                                                                                                                                                                                                                                                                                                  | Abstract                                        |
| <b>Methods</b>        |          |                                                                                                                                                                                                                     |                                                                                                                                                                                                                                                                                                                                                                                                                                                                                                                     |                                                 |
| Study design          | 4        | Present key elements of study design early in the paper.                                                                                                                                                            | --                                                                                                                                                                                                                                                                                                                                                                                                                                                                                                                  | Study Design and Setting                        |
| Setting               | 5        | Describe the setting, locations, and relevant dates, including periods of recruitment, exposure, follow-up, and data collection.                                                                                    | --                                                                                                                                                                                                                                                                                                                                                                                                                                                                                                                  | Study Design and Setting                        |
| Participants          | 6        | (a) Give the eligibility criteria, and the sources and methods of selection of participants. Describe methods of follow-up.<br>(b) For matched studies, give matching criteria and number of exposed and unexposed. | (6.1) The methods of study population selection (such as codes or algorithms used to identify subjects) should be listed in detail. If this is not possible, an explanation should be provided.<br>(6.2) Any validation studies of the codes or algorithms used to select the population should be referenced. If validation was conducted for this study and not published elsewhere, detailed methods and results should be provided.<br>(6.3) If the study involved linkage of databases, consider use of a flow | Population and Data Sources, Outcomes, Figure 1 |

|                                  |    |                                                                                                                                                                                                                                                                                                                             |                                                                                                                                                                                                                                              |                                              |
|----------------------------------|----|-----------------------------------------------------------------------------------------------------------------------------------------------------------------------------------------------------------------------------------------------------------------------------------------------------------------------------|----------------------------------------------------------------------------------------------------------------------------------------------------------------------------------------------------------------------------------------------|----------------------------------------------|
|                                  |    |                                                                                                                                                                                                                                                                                                                             | diagram or other graphical display to demonstrate the data linkage process, including the number of individuals with linked data at each stage.                                                                                              |                                              |
| Variables                        | 7  | Clearly define all outcomes, exposures, predictors, potential confounders, and effect modifiers. Give diagnostic criteria, if applicable.                                                                                                                                                                                   | (7.1) A complete list of codes and algorithms used to classify exposures, outcomes, confounders, and effect modifiers should be provided. If these cannot be reported, an explanation should be provided.                                    | Outcomes, Statistical Analyses, Appendix 1-4 |
| Data sources/<br>measurement     | 8  | For each variable of interest, give sources of data and details of methods of assessment (measurement). Describe comparability of assessment methods if there is more than one group.                                                                                                                                       | --                                                                                                                                                                                                                                           | Population and Data Sources, Appendix 1-4    |
| Bias                             | 9  | Describe any efforts to address potential sources of bias.                                                                                                                                                                                                                                                                  | --                                                                                                                                                                                                                                           | Statistical Analyses                         |
| Study size                       | 10 | Explain how the study size was arrived at.                                                                                                                                                                                                                                                                                  | --                                                                                                                                                                                                                                           | Population and Data Sources                  |
| Quantitative variables           | 11 | Explain how quantitative variables were handled in the analyses. If applicable, describe which groupings were chosen and why.                                                                                                                                                                                               | --                                                                                                                                                                                                                                           | Statistical Analyses                         |
| Statistical methods              | 12 | (a) Describe all statistical methods, including those used to control for confounding.<br>(b) Describe any methods used to examine subgroups and interactions.<br>(c) Explain how missing data were addressed.<br>(d) If applicable, explain how loss to follow-up was addressed.<br>(e) Describe any sensitivity analyses. | --                                                                                                                                                                                                                                           | Statistical Analyses                         |
| Data access and cleaning methods | -- | N/A                                                                                                                                                                                                                                                                                                                         | (12.1) Authors should describe the extent to which the investigators had access to the database population used to create the study population.<br>(12.2) Authors should provide information on the data cleaning methods used in the study. | Population and Data Sources                  |
| Linkage                          | -- | N/A                                                                                                                                                                                                                                                                                                                         | (12.3) State whether the study included person-level, institutional-level, or other data linkage across two or more databases. The methods of linkage and methods of linkage quality evaluation should be provided.                          | Population and Data Sources                  |

| Results          |    |                                                                                                                                                                                                                                                                                                                                                                                                                   |                                                                                                                                                                                                                                                                                                       |                                                                                                |
|------------------|----|-------------------------------------------------------------------------------------------------------------------------------------------------------------------------------------------------------------------------------------------------------------------------------------------------------------------------------------------------------------------------------------------------------------------|-------------------------------------------------------------------------------------------------------------------------------------------------------------------------------------------------------------------------------------------------------------------------------------------------------|------------------------------------------------------------------------------------------------|
| Participants     | 13 | (a) Report numbers of individuals at each stage of study--e.g. numbers potentially eligible, examined for eligibility, confirmed eligible, included in the study, completing follow-up, and analyzed.<br>(b) Give reasons for non-participation at each stage.<br>(c) Consider use of a flow diagram.                                                                                                             | (13.1) Describe in detail the selection of the persons included in the study (i.e., study population selection), including filtering based on data quality, data availability, and linkage. The selection of included persons can be described in the text and/or by means of the study flow diagram. | Study Population and Setting, Figure 1                                                         |
| Descriptive data | 14 | (a) Give characteristics of study participants (e.g. demographic, clinical, social) and information on exposures and potential confounders.<br>(b) Indicate number of participants with missing data for each variable of interest.<br>(c) Summarize follow-up time (e.g. average and total amount).                                                                                                              | --                                                                                                                                                                                                                                                                                                    | Results                                                                                        |
| Outcome data     | 15 | Report numbers of outcome events or summary measures over time.                                                                                                                                                                                                                                                                                                                                                   | --                                                                                                                                                                                                                                                                                                    | Results, AKI incidence across Cancer Types                                                     |
| Main results     | 16 | (a) Give unadjusted estimates and, if applicable, confounder-adjusted estimates and their precision (e.g. 95% confidence interval). Make clear which confounders were adjusted for and why they were included.<br>(b) Report category boundaries when continuous variables were categorized.<br>(c) If relevant, consider translating estimates of relative risk into absolute risk for a meaningful time period. | --                                                                                                                                                                                                                                                                                                    | Results, AKI incidence across Cancer Types                                                     |
| Other analyses   | 17 | Report other analyses done (e.g. analyses of subgroups and interactions, and sensitivity analyses).                                                                                                                                                                                                                                                                                                               | --                                                                                                                                                                                                                                                                                                    | Effect of Recent Systemic Therapy, Effect of Co-prescription, Temporal Trends in AKI Incidence |
| Key results      | 18 | Summarize key results with reference to study objectives.                                                                                                                                                                                                                                                                                                                                                         | --                                                                                                                                                                                                                                                                                                    | Results, Discussion                                                                            |
| Limitations      | 19 | Discuss limitations of the study, taking into account sources of potential bias or imprecision. Discuss both direction and magnitude of any potential bias.                                                                                                                                                                                                                                                       | (19.1) Discuss the implications of using data that were not created or collected to answer the specific research question(s). Include discussion of misclassification bias, unmeasured confounding, missing data, and changing eligibility over time,                                                 | Discussion                                                                                     |

as they pertain to the study being reported.

|                                                           |    |                                                                                                                                                                             |                                                                                                                                                    |                  |
|-----------------------------------------------------------|----|-----------------------------------------------------------------------------------------------------------------------------------------------------------------------------|----------------------------------------------------------------------------------------------------------------------------------------------------|------------------|
| Interpretation                                            | 20 | Give a cautious overall interpretation of results considering objectives, limitations, multiplicity of analyses, results from similar studies, and other relevant evidence. | --                                                                                                                                                 | Discussion       |
| Generalizability                                          | 21 | Discuss the generalizability (external validity) of the study results.                                                                                                      | --                                                                                                                                                 | Discussion       |
| <b>Other information</b>                                  |    |                                                                                                                                                                             |                                                                                                                                                    |                  |
| Funding                                                   | 22 | Give the source of funding and the role of the funders for the present study and, if applicable, for the original study on which the present article is based.              | --                                                                                                                                                 | Acknowledgements |
| Accessibility of protocol, raw data, and programming code | -- | N/A                                                                                                                                                                         | (22.1) Authors should provide information on how to access any supplemental information such as the study protocol, raw data, or programming code. | Appendices 1-4   |

\*Benchimol EI, Smeeth L, Guttman A, Harron K, Moher D, Petersen I, et al. (2015) The REporting of studies Conducted using Observational Routinely-collected health Data (RECORD) Statement. PLoS Med 12(10): e1001885. doi:10.1371/journal.pmed.1001885



**Supplementary Table 2. Administrative Cancer Diagnostic Codes\***

| <b>ICD-O-3 Description</b>                     | <b>Codes</b>                                                                             |
|------------------------------------------------|------------------------------------------------------------------------------------------|
| OCR Topographical Codes                        |                                                                                          |
| Head and Neck                                  | C00, C01, C02, C03, C04, C05, C06, C07, C08, C09, C10, C11, C12, C13, C14, C30, C31, C32 |
| Esophageal                                     | C15                                                                                      |
| Gastric                                        | C16                                                                                      |
| Small Intestine                                | C17                                                                                      |
| Colorectal                                     | C18, C19, C20                                                                            |
| Anal                                           | C21                                                                                      |
| Hepatobiliary                                  | C22, C23, C24                                                                            |
| Pancreatic                                     | C25                                                                                      |
| Gastrointestinal – other                       | C26                                                                                      |
| Lung, tracheal and bronchogenic                | C33, C34                                                                                 |
| Thymus                                         | C37                                                                                      |
| Heart, mediastinal and pleural                 | C38                                                                                      |
| Intrathoracic – other                          | C39                                                                                      |
| Bones, joints and articular cartilage of limbs | C40, C41                                                                                 |
| Hematologic                                    | C42                                                                                      |
| Skin                                           | C44                                                                                      |
| Peripheral Nervous System                      | C47                                                                                      |
| Retroperitoneal/ peritoneal Tissues            | C48                                                                                      |
| Muscle, connective and subcutaneous tissues    | C49                                                                                      |
| Breast                                         | C50                                                                                      |
| Female genital                                 | C51, C52, C53, C54, C55, C56, C57, C58                                                   |
| Male genital                                   | C60, C61, C62, C63                                                                       |
| Renal                                          | C64, C65                                                                                 |
| Ureterovesicular                               | C66, C67, C68                                                                            |
| Ocular                                         | C69                                                                                      |
| Central nervous system                         | C70, C71, C72                                                                            |
| Thyroid                                        | C73                                                                                      |
| Adrenal                                        | C74                                                                                      |
| Endocrine gland                                | C75                                                                                      |
| Other                                          | C76                                                                                      |
| Lymphoma                                       | C77                                                                                      |

|                       |                                                                                                                                                                                                                                                                                                                           |
|-----------------------|---------------------------------------------------------------------------------------------------------------------------------------------------------------------------------------------------------------------------------------------------------------------------------------------------------------------------|
| Unknown primary site  | C80                                                                                                                                                                                                                                                                                                                       |
| OCR Morphologic Codes |                                                                                                                                                                                                                                                                                                                           |
| Non-melanoma Skin     | 80500, 80502, 80503, 80510, 80513, 80513, 80520, 80522, 80523, 80530, 80600, 80702, 80703, 80706, 80713, 80723, 80733, 80743, 80753, 80762, 80763, 80812, 80823, 80833, 80843, 80901, 80903, 80913, 80923, 80933, 80943, 80953, 80960, 80973                                                                              |
| Melanoma              | 87203, 87403, 87412, 87413, 87423, 87433, 87443, 87453, 87463, 87703, 87723, 87733, 87743                                                                                                                                                                                                                                 |
| Lymphoma              | 95913, 95963, 96503, 96513, 96523, 96533, 96543, 96553, 96593, 96613, 96623, 96633, 96643, 96653, 96673, 96703, 96713, 96733, 96753, 96783, 96793, 96803, 96843, 96873, 96893, 96903, 96913, 96953, 96983, 96993, 97003, 97013, 97023, 97053, 97083, 97093, 97143, 97163, 97173, 97183, 97193, 97273, 97283, 97293, 99701 |
| Myeloma               | 97313, 97323                                                                                                                                                                                                                                                                                                              |
| Leukemia              | 98003, 98013, 98053, 98203, 98233, 98263, 98273, 98273, 98311, 98323, 98333, 98343, 98353, 98363, 98373, 98403, 98603, 98613, 98633, 98673, 98703, 98713, 98723, 98733, 98743, 98753, 98763, 98913, 98953, 98963, 98973, 99103, 99203, 99403, 99453, 99463, 99483, 99633, 99643                                           |

\*Abbreviations: ICD-O-3, International Classification of Diseases for Oncology, third edition; OCR, Ontario Cancer Registry.

**Supplementary Table 3: Acute Kidney Injury Codes**

| <b>Diagnostic Code</b>                                | <b>Description</b>                                                |
|-------------------------------------------------------|-------------------------------------------------------------------|
| Acute Kidney Injury Diagnostic Codes (ICD-10)         |                                                                   |
| N17                                                   | Acute kidney failure                                              |
| Acute Kidney Injury Requiring Dialysis Billing Codes* |                                                                   |
| G082                                                  | Continuous venovenous haemodiafiltration                          |
| G083                                                  | Continuous venovenous haemodialysis                               |
| G085                                                  | Continuous venovenous haemofiltration                             |
| G090                                                  | Venovenous slow continuous ultrafiltration                        |
| G091                                                  | Continuous arteriovenous haemodialysis                            |
| G092                                                  | Continuous arteriovenous haemodiafiltration                       |
| G093                                                  | Haemodiafiltration - Contin. Init & Acute (repeat x3)             |
| G095                                                  | Slow Continuous Ultra Filtration - Initial & Acute (repeat)       |
| G295                                                  | Continuous atero-venous haemofiltration initial and acute         |
| G294                                                  | Arteriovenous slow continuous ultrafiltration init and acute      |
| R849                                                  | Dialysis – Haemodialysis - Initial & acute                        |
| R850                                                  | Dialysis-Haemodialysis-Insert Scribner Shunt                      |
| G323                                                  | Dialysis – Haemodialysis - Acute, repeat (max 3)                  |
| G325                                                  | Dialysis – Haemodialysis - Medical component (incl in unit fee)   |
| G326                                                  | Dialysis - Chronic, contin. haemodialysis or haemofiltration each |
| G862                                                  | Hospital self care Chronic hemodialysis                           |
| G863                                                  | Chronic hemodialysis IHF location                                 |
| G866                                                  | Intermittent hemodialysis treatment centre                        |

\* Ontario Health Insurance Plan fee code. Abbreviations: ICD-10, International Classification of Diseases, tenth edition.

**Supplementary Table 4. Evidence of Systemic Therapy**

| <b>Dataset</b>                                    | <b>Variable or Diagnostic Codes Used to Establish Systemic Therapy Receipt</b> |
|---------------------------------------------------|--------------------------------------------------------------------------------|
| Cancer Care Ontario – Activity Level Reporting    | 'Systemic Dataset': 'visit_date' variable                                      |
| Ontario Health Insurance Plan (OHIP)              | Fee codes: "G345", "G359", "G381", "G382", "G388"                              |
| New Drug Funding Plan (NDFP)                      | 'treatment_date' variable                                                      |
| National Ambulatory Care Reporting System (NACRS) | ICD-10 codes: "Z511", "Z512"                                                   |

**Supplementary Table 5.** Top 40 Most Frequently Observed Cancer Care Ontario (Activity Level Reporting Data) Systemic Treatment Entries (2007 to 2014)

| <b>Cancer Care Ontario Regimen Entry*</b> | <b>Frequency (n)</b> | <b>%</b> |
|-------------------------------------------|----------------------|----------|
| *PACLICARBO                               | 27661                | 4.8      |
| *CHOP-RITUXIMAB                           | 27517                | 4.8      |
| *FOLFOX                                   | 23385                | 4.0      |
| *FEC 100                                  | 19281                | 3.3      |
| *CRBPPACL                                 | 17436                | 3.0      |
| *CHOP+R                                   | 15721                | 2.7      |
| *CISP                                     | 14330                | 2.5      |
| *GEM-CISP                                 | 11845                | 2.0      |
| *ECF                                      | 11483                | 2.0      |
| *FEC-T                                    | 11161                | 1.9      |
| *FOLFIRI-BEVACIZUMAB                      | 10749                | 1.9      |
| *AC-TAXOL DD                              | 10599                | 1.8      |
| *ABVD                                     | 10254                | 1.8      |
| *CISPETOP -3 DAYS                         | 10215                | 1.8      |
| *VINOCISP                                 | 10157                | 1.8      |
| *AC-PACL(DD)                              | 9481                 | 1.6      |
| *MFOLFOX6                                 | 9080                 | 1.6      |
| *CVP-RITUXIMAB                            | 9061                 | 1.6      |
| *AC                                       | 8434                 | 1.5      |
| *FOLFIRI+BEVA                             | 8189                 | 1.4      |
| *FEC100                                   | 7862                 | 1.4      |
| *TC                                       | 7407                 | 1.3      |
| *CISPGEMC                                 | 7013                 | 1.2      |
| *CYCLDOCE                                 | 5792                 | 1        |
| *FOLFIRI                                  | 5388                 | 0.9      |
| *CISPETOP(3D)                             | 5319                 | 0.9      |
| *ETOPCARBO                                | 5296                 | 0.9      |
| *FU-CISP                                  | 4791                 | 0.8      |
| *GEM-CARBO                                | 4709                 | 0.8      |
| *FOLFOX4                                  | 4703                 | 0.8      |
| *CYCLO IV                                 | 4636                 | 0.8      |
| *GEMCIT                                   | 4442                 | 0.8      |
| *FOLFIRINOX                               | 4414                 | 0.8      |
| *CISPVINO                                 | 4122                 | 0.7      |
| *FEC-D                                    | 3842                 | 0.7      |
| *ECX                                      | 3702                 | 0.6      |
| *CARBO                                    | 3701                 | 0.6      |
| *CVP+R                                    | 3632                 | 0.6      |

|             |      |     |
|-------------|------|-----|
| *BEP-5-DAYS | 3230 | 0.6 |
| *BEND+RITU  | 2955 | 0.5 |

\*Data entries presented as they appear in the Cancer Care Ontario Activity Level Reporting dataset

**Supplementary Table 6.** Top 35 Most Frequently Observed New Drug Funding Plan Systemic Treatment Entries (2007 to 2014)\*

| <b>New Drug Funding Program Entry</b> | <b>Frequency (n)</b> | <b>%</b> |
|---------------------------------------|----------------------|----------|
| Paclitaxel                            | 13588                | 14.8     |
| Epirubicin                            | 11821                | 12.9     |
| Rituximab                             | 11455                | 12.5     |
| Oxaliplatin                           | 11394                | 12.4     |
| Gemcitabine                           | 9521                 | 10.4     |
| Docetaxel                             | 7522                 | 8.2      |
| Irinotecan                            | 5311                 | 5.8      |
| Pamidronate                           | 4774                 | 5.2      |
| Vinorelbine                           | 3590                 | 3.9      |
| Trastuzumab                           | 3002                 | 3.3      |
| Bevacizumab                           | 2450                 | 2.7      |
| Bortezomib                            | 1570                 | 1.7      |
| Interferon                            | 959                  | 1.1      |
| Zoledronic Acid                       | 838                  | 0.9      |
| Azacitidine                           | 824                  | 0.9      |
| Pemetrexed                            | 691                  | 0.8      |
| Bendamustine                          | 687                  | 0.8      |
| Denosumab                             | 465                  | 0.5      |
| Cetuximab                             | 287                  | 0.3      |
| Ipilimumab                            | 283                  | 0.3      |
| Raltitrexed                           | 178                  | 0.2      |
| Liposomal Doxorubicin                 | 137                  | 0.2      |
| Fludarabine                           | 67                   | 0.1      |
| Pertuzumab                            | 64                   | 0.1      |
| Nab-Paclitaxel                        | 59                   | 0.1      |
| Temsirolimus                          | 55                   | 0.1      |
| Panitumumab                           | 41                   | 0.04     |
| Brentuximab                           | 34                   | 0.04     |
| Topotecan                             | 23                   | 0.03     |
| Radium-223 Dichloride                 | 20                   | 0.02     |
| Arsenic Trioxide                      | 10                   | 0.01     |
| Obinutuzumab                          | 9                    | 0.01     |
| Pembrolizumab                         | 9                    | 0.01     |
| Eribulin                              | 6                    | 0.01     |

\*Institute for Clinical Evaluative Sciences privacy regulations do not allow reporting of data with 5 or fewer individuals due to the potential risk of re-identification. For this reason, the table was truncated to 35 entries (those with frequency of  $\geq 6$  individuals).

## Supplementary Figure

*Example patient exposure status during follow-up:*

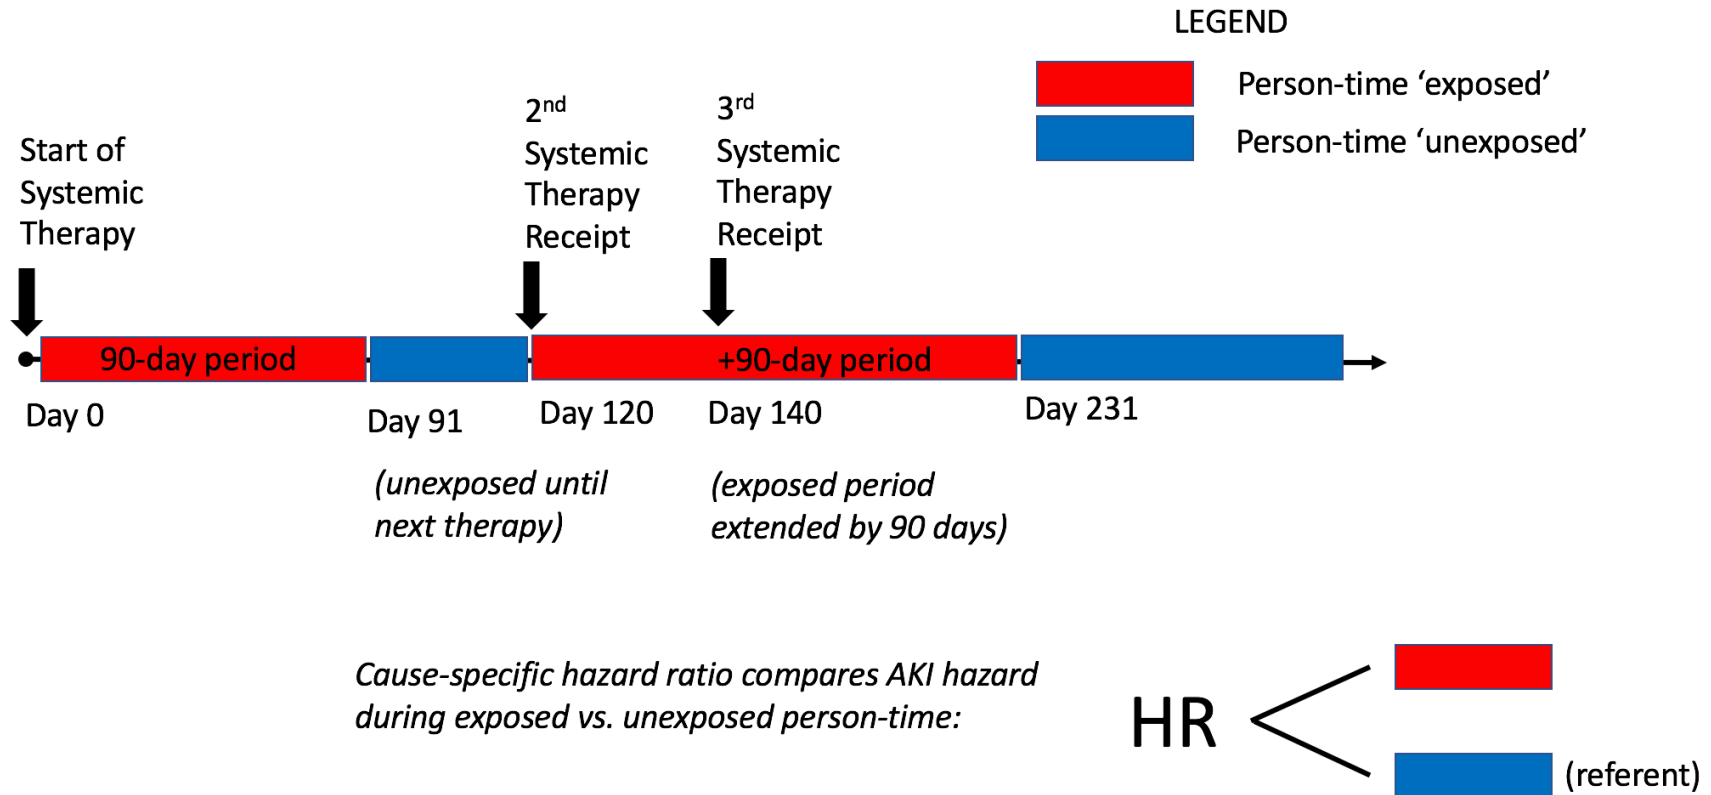

**Supplementary Figure 1. Illustrative Example of Patient Exposure Status in the Time-varying Covariate Analysis for the Effect of Systemic Therapy Exposure. HR = hazard ratio.**



## Supplementary References

1. Siew ED, Parr SK, Abdel-Kader K, *et al.* Predictors of Recurrent AKI. *J Am Soc Nephrol* 2016;27(4):1190-200.
2. Levy AR, O'Brien BJ, Sellors C, *et al.* Coding accuracy of administrative drug claims in the Ontario Drug Benefit database. *Can J Clin Pharmacol* 2003;10(2):67-71.
3. Juurlink D PC, Croxford R, Chong A, Austin P, Tu J, Laupacis A. Canadian Institute for Health Information Discharge Abstract Database: A Validation Study. In. Toronto: Institute for Clinical Evaluative Sciences; 2006.
4. Groenwold RH, White IR, Donders AR, *et al.* Missing covariate data in clinical research: when and when not to use the missing-indicator method for analysis. *CMAJ* 2012;184(11):1265-9.
5. Sterne JA, White IR, Carlin JB, *et al.* Multiple imputation for missing data in epidemiological and clinical research: potential and pitfalls. *BMJ* 2009;338:b2393.
